# Supplementary material for: Blueberry-Derived Exosome-Like Nanoparticles Counter the Response to TNF-α-Induced Change on Gene Expression in EA.hy926 Cells
Source: MDPI journal article supplement (doi:10.3390/biom10050742), 2020-05-10
Supplement: s1 [file s1]

Supplemental Material

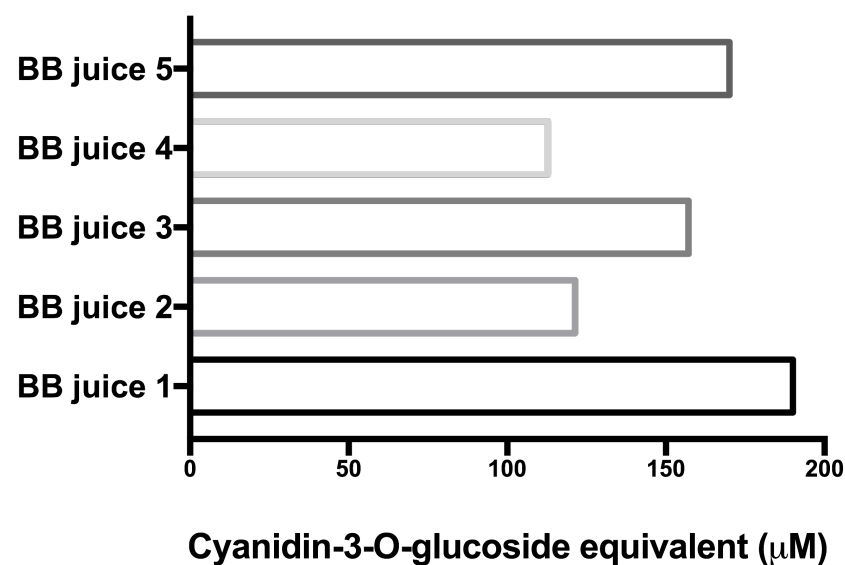

**Supplemental figure S1.** Content of cyanidin-3-O-glucoside equivalent (C3G), based on its specific absorbance peak at 520 nm in BB juice, measured before being processed for ELNs isolation. Bar represent concentration ( $\mu\text{M}$ ) for each juice.

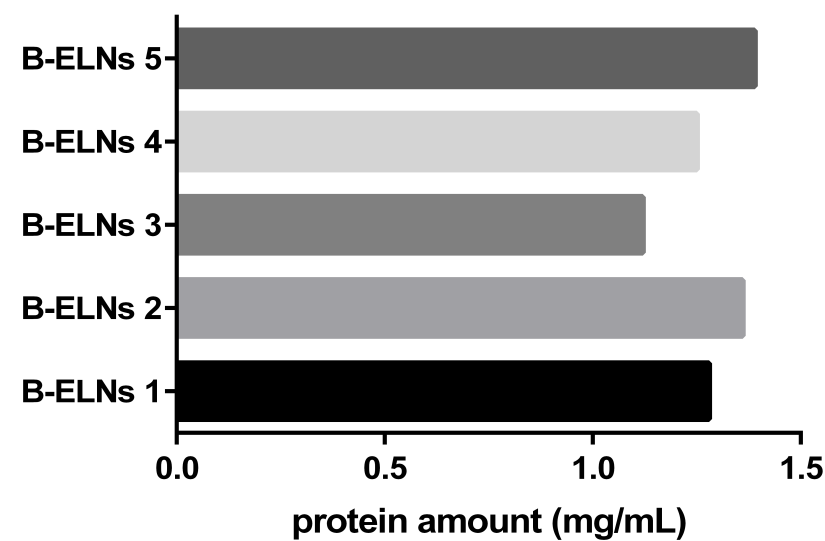

**Supplemental figure S2.** Protein content of B-ELNs isolated from different BB juice. Bar represent protein amount (mg/mL) for each B-ELNs isolation.

**Supplemental table S1.** List of genes and probes selected to undergo to real-time qPCR analysis.

| <b>Gene Symbol</b> | <b>Gene Name</b>                   | <b>Assay ID</b> |
|--------------------|------------------------------------|-----------------|
| <i>ACTB</i>        | Actin                              | Hs01060665_g1   |
| <i>GUSB</i>        | glucuronidase beta                 | Hs00939627_m1   |
| <i>HMOX1</i>       | heme oxygenase 1                   | Hs01110250_m1   |
| <i>ICAM1</i>       | intercellular adhesion molecule 1  | Hs00164932_m1   |
| <i>IL1RL1</i>      | interleukin 1 receptor like 1      | Hs00249384_m1   |
| <i>IL6</i>         | interleukin 6                      | Hs00174131_m1   |
| <i>MAPK1</i>       | mitogen-activated protein kinase 1 | Hs01046830_m1   |
| <i>NRF1</i>        | nuclear respiratory factor 1       | Hs00602161_m1   |
| <i>TLR8</i>        | toll like receptor 8               | Hs00152972_m1   |
| <i>TNF</i>         | tumor necrosis factor              | Hs00174128_m1   |
